# Supplementary material
Source: PubMed Central journal article supplement (PMC3586539)
Supplement: NIHMS430354-supplement-1_si_001.pdf [file NIHMS430354-supplement-1_si_001.pdf]

## Supplemental Information

### MATERIALS AND METHODS

#### Synthetic Procedures

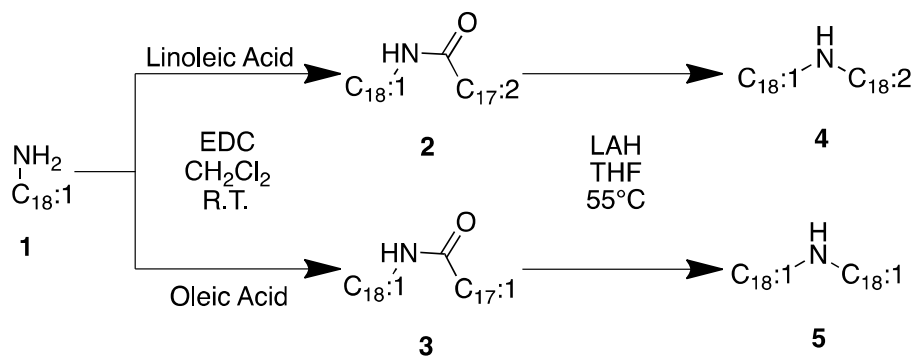

**Scheme 1:** Synthesis of dialkylamine precursors

#### Synthesis of 2

2.3g of linoleic acid (280.45g/mol, 8.2mmol, 1.1eq) and 1.8g 1-Ethyl-3-(3-dimethylaminopropyl)carbodiimide (EDC) (155.24g/mol, 11.6mmol, 1.5 eq) were added to 30 mL CH<sub>2</sub>Cl<sub>2</sub> and the solution was cooled on ice to 4°C. In a separate vessel, 2g of **1** (oleylamine, 267.49g/mol, 7.48mmol, 1.0 eq) was dissolved in 10 mL CH<sub>2</sub>Cl<sub>2</sub>. The solution of **1** was then added dropwise over 20 minutes. The reaction was allowed to gradually warm to room temperature while stirring overnight. CH<sub>2</sub>Cl<sub>2</sub> was removed by rotary evaporation, and the resulting oil was solubilized in 100mL ethyl acetate (EtOAc) and washed 3x with 20mL 1M HCl and 2x with 20mL brine. The organic layer was then dried over Na<sub>2</sub>SO<sub>4</sub> and concentrated to an oil. Further purification was not carried out on this compound. 3.8g (96%). MW calc. (C<sub>36</sub>H<sub>67</sub>NO) = 529.92 found 530.76. TLC: R<sub>f</sub> = 0.7 (99:1 CH<sub>2</sub>Cl<sub>2</sub>:MeOH).

<sup>1</sup>H NMR (300 MHz, CDCl<sub>3</sub>): 5.50-5.30 (m, 6H), 3.30-3.20 (m, 2H), 2.90-2.80 (m, 2H), 2.20-2.10 (m, 2H), 2.10-1.90 (m, 8H), 1.70-1.60 (m, 2H), 1.60-1.50 (m, 2H), 1.40-1.10 (m, 36H), 0.90 (m, 6H).

#### Synthesis of 3

1g of oleic acid (282.46g/mol, 3.5mmol, 1.1 eq) and 0.82g EDC (155.24g/mol, 5.25mmol, 1.5 eq) were added to 20mL CH<sub>2</sub>Cl<sub>2</sub>, and the solution was cooled on ice to 4°C. In a separate vessel, 0.85g **1** (oleylamine, 267.49g/mol, 3.2mmol, 1.0 eq) was dissolved in 10 mL CH<sub>2</sub>Cl<sub>2</sub>. The solution of **1** was then added dropwise over 20 minutes. The reaction was allowed to gradually warm to room temperature while stirring overnight. CH<sub>2</sub>Cl<sub>2</sub> was removed by rotary evaporation, and the resulting oil was solubilized in 50mL EtOAc and washed 3x with 20mL 1M HCl and 2x with 20mL brine. The organic layer was then dried over Na<sub>2</sub>SO<sub>4</sub> and concentrated to an oil. Further purification was not carried out on this compound. 1.58g (93%). MW calc. (C<sub>36</sub>H<sub>69</sub>NO) = 531.94 found 532.81. TLC: R<sub>f</sub> = 0.7 (99:1 CH<sub>2</sub>Cl<sub>2</sub>:MeOH).

<sup>1</sup>H NMR (300 MHz, CDCl<sub>3</sub>): 5.50-5.30 (m, 4H), 3.30-3.20 (m, 2H), 2.20-2.10 (m, 2H), 2.10-1.90 (m, 8H), 1.70-1.60 (m, 2H), 1.60-1.50 (m, 2H), 1.40-1.10 (m, 42H), 0.90 (m, 6H).

#### Synthesis of 4

0.82g of lithium aluminum hydride (LAH) (37.95g/mol, 21.5mmol, 3.0 eq) was suspended in 25mL anhydrous THF and cooled in an ice bath to 4°C. 3.8g of **2** (529.92g/mol, 7.2mmol, 1.0 eq) was solubilized in 20mL anhydrous THF and added dropwise to the LAH solution over 1 hour. The reaction was allowed to warm to room temperature, then heated to 55°C and stirred overnight. After 24 hours, the reaction was cooled back to 4°C in an ice bath, and excess LAH was quenched by the slow addition of 5mL deionized H<sub>2</sub>O followed by 1 hour of stirring at 4°C. The solid salts were removed by filtration, and the THF:H<sub>2</sub>O mixture was removed by rotary evaporation. The remaining oily solid was solubilized in 100mL diethyl ether and washed 2x with 20mL 1M HCl, 2x with 20mL brine. The organic layer was then dried over Na<sub>2</sub>SO<sub>4</sub> and concentrated to an oil. Further purification was not carried out on this compound. 3.35g (91%). MW calc. (C<sub>36</sub>H<sub>69</sub>N) = 515.94 found 516.18. TLC: R<sub>f</sub> = 0.15 (99:1 CH<sub>2</sub>Cl<sub>2</sub>:MeOH).

<sup>1</sup>H NMR (300 MHz, CDCl<sub>3</sub>): 5.50-5.30 (m, 6H), 3.00-2.80 (m, 4H), 2.80-2.70 (m, 2H), 2.10-1.90 (m, 8H), 1.90-1.70 (m, 4H), 1.40-1.10 (m, 38H), 0.90 (m, 6H).

### Synthesis of **5**

0.34g of LAH (37.95g/mol, 8.9mmol, 3.0 eq) was suspended in 20mL anhydrous THF and cooled in an ice bath to 4°C. 1.58g of **3** (531.94g/mol, 3.0mmol, 1.0 eq) was solubilized in 15mL anhydrous THF and added dropwise to the LAH solution over 1 hour. The reaction was allowed to warm to room temperature, then heated to 55°C and stirred overnight. After 24 hours, the reaction was cooled back to 4°C in an ice bath, and excess LAH was quenched by the slow addition of 5mL deionized H<sub>2</sub>O followed by 1 hour of stirring at 4°C. The solid salts were removed by filtration, and the THF:H<sub>2</sub>O mixture was removed by rotary evaporation. The remaining oily solid was solubilized in 100mL diethyl ether and washed 2x with 20mL 1M HCl, 2x with 20mL brine. The organic layer was then dried over Na<sub>2</sub>SO<sub>4</sub> and concentrated to an oil. Further purification was not carried out on this compound. 1.35g (87%). MW calc. (C<sub>36</sub>H<sub>69</sub>N) = 517.96 found 518.78. TLC: R<sub>f</sub> = 0.15 (99:1 CH<sub>2</sub>Cl<sub>2</sub>:MeOH).

<sup>1</sup>H NMR (300 MHz, CDCl<sub>3</sub>): 5.50-5.30 (m, 4H), 2.70-2.50 (m, 4H), 2.10-1.90 (m, 8H), 1.60-1.40 (m, 4H), 1.40-1.10 (m, 44H), 0.90 (m, 6H).

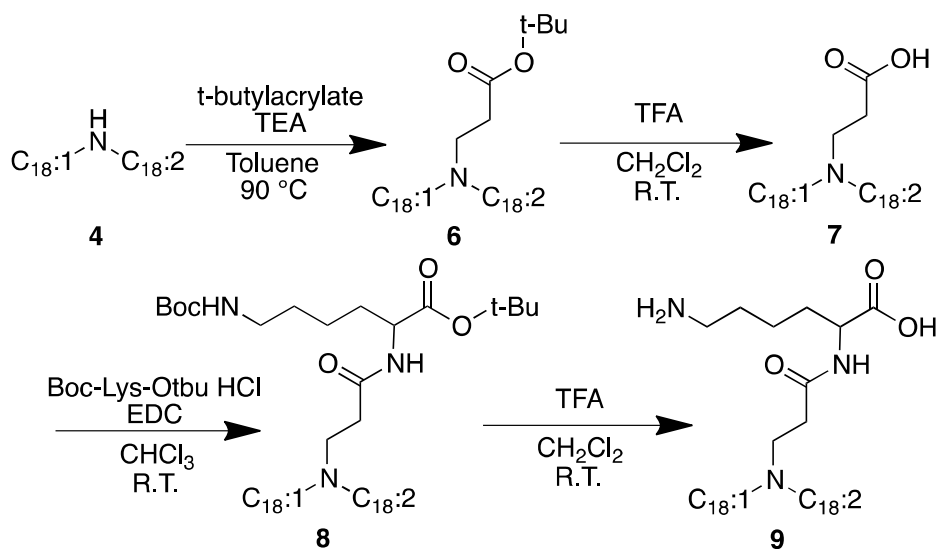

**Scheme 2:** Synthesis of LOA-LysC2

### Synthesis of **6**

3.3g of **4** (515.94g/mol, 6.4mmol, 1.0 eq), 1.6g of t-butylacrylate (128.17g/mol, 12.8mmol, 2.0 eq), and 2.6g triethylamine (TEA) (101.19g/mol, 25.6mmol, 4.0 eq) were solubilized in 10mL toluene and stirred at 90°C for 72 hours. Solvent was removed by rotary evaporation, and the resulting oil was solubilized in 100 mL EtOAc, washed 2x with 20mL 1M HCl and 2x with 20mL brine. The organic layer was then dried over Na<sub>2</sub>SO<sub>4</sub> and concentrated to an oil. The crude product was purified by HPFC using an elution gradient of 0-8% MeOH in CHCl<sub>3</sub>. MW calc. (C<sub>43</sub>H<sub>81</sub>NO<sub>2</sub>) = 644.11 found 645.01. 2.76g (67%). TLC: R<sub>f</sub> = 0.9 (95:4.5:0.5 CH<sub>2</sub>Cl<sub>2</sub>:MeOH:NH<sub>3</sub>OH).

<sup>1</sup>H NMR (300 MHz, CDCl<sub>3</sub>): 5.50-5.30 (m, 6H), 3.50-3.40 (m, 2H), 3.30-3.20 (m, 2H), 3.00-2.80 (m, 4H), 2.80-2.70 (m, 2H), 2.10-1.90 (m, 8H), 1.90-1.70 (m, 4H), 1.50 (s, 9H) 1.40-1.10 (m, 38H), 0.90 (m, 6H).

#### *Synthesis of 7*

2.7g of **6** (644.11g/mol, 4.2mmol) was stirred in 15mL 1:1 TFA:CH<sub>2</sub>Cl<sub>2</sub> at room temperature for 1 hour. TFA and CH<sub>2</sub>Cl<sub>2</sub> were removed by rotary evaporation, and the resulting oil was solubilized in 100 mL EtOAc, washed 2x with 20mL 1M NaHCO<sub>3</sub> and 2x with 20mL brine. The organic layer was dried over Na<sub>2</sub>SO<sub>4</sub> and concentrated to an oil. MW calc. (C<sub>39</sub>H<sub>73</sub>NO<sub>2</sub>) = 588.0 found 588.91. 2.32g (94%). TLC: R<sub>f</sub> = 0.3 (95:4.5:0.5 CH<sub>2</sub>Cl<sub>2</sub>:MeOH:NH<sub>3</sub>OH).

<sup>1</sup>H NMR (300 MHz, CDCl<sub>3</sub>): 5.50-5.30 (m, 6H), 3.50-3.40 (m, 2H), 3.30-3.20 (m, 2H), 3.00-2.80 (m, 4H), 2.80-2.70 (m, 2H), 2.10-1.90 (m, 8H), 1.90-1.70 (m, 4H), 1.40-1.10 (m, 38H), 0.90 (m, 6H).

#### *Synthesis of 8*

1.05g of **7** (588.0g/mol, 1.8mmol, 1.0 eq), 0.68g Boc-Lys-Otbu HCl (338.87g/mol, 2mmol, 1.1 eq), 0.42g EDC (155.24g/mol, 2.7mmol, 1.5 eq) were added to 30mL CHCl<sub>3</sub> and stirred at room temperature for 24 hours. Solvent was removed by rotary evaporation. The resulting oily solid was solubilized in 100mL EtOAc and washed 2x with 20mL 1M HCl and 2x with 20mL brine. The organic layer was dried over Na<sub>2</sub>SO<sub>4</sub> and concentrated to an oil. The crude product was purified by HPFC using an elution gradient of 0-10% MeOH in CHCl<sub>3</sub>. MW calc (C<sub>54</sub>H<sub>101</sub>N<sub>3</sub>O<sub>5</sub>) = 872.40 found 873.31. 1.04g (66%). TLC: R<sub>f</sub> = 0.45 (95:4.5:0.5 CH<sub>2</sub>Cl<sub>2</sub>:MeOH:NH<sub>3</sub>OH).

<sup>1</sup>H NMR (300 MHz, CDCl<sub>3</sub>): 5.50-5.30 (m, 6H), 4.40 (m, 1H), 3.50-3.40 (m, 2H), 3.30-3.20 (m, 2H), 3.20-3.10 (m, 2H), 3.00-2.80 (m, 4H), 2.80-2.70 (m, 2H), 2.10-1.90 (m, 8H), 1.90-1.70 (m, 8H), 1.55 (m, 2H), 1.40 (s, 18H), 1.40-1.10 (m, 38H), 0.90 (m, 6H).

#### *Synthesis of 9*

1.04g of **8** (872.40g/mol, 1.2mmol, 1.0 eq) was stirred in 10mL 1:1 TFA:CH<sub>2</sub>Cl<sub>2</sub> at room temperature for 1 hour. TFA and CH<sub>2</sub>Cl<sub>2</sub> were removed by rotary evaporation, and the resulting oil was solubilized in 50 mL EtOAc, washed 2x with 10mL 1M NaHCO<sub>3</sub> and 2x with 10mL brine. The organic layer was dried over Na<sub>2</sub>SO<sub>4</sub> and concentrated to an oil. The crude product was purified by HPFC using an elution gradient of 0-30% MeOH in CHCl<sub>3</sub>. MW calc. (C<sub>45</sub>H<sub>85</sub>N<sub>3</sub>O<sub>3</sub>) = 716.17 found 717.12. 0.64g (75%). TLC: R<sub>f</sub> = 0.15 (72.5:25:2.5 CH<sub>2</sub>Cl<sub>2</sub>:MeOH:NH<sub>3</sub>OH).

<sup>1</sup>H NMR (300 MHz, CDCl<sub>3</sub>): 5.50-5.30 (m, 6H), 4.40 (m, 1H), 3.50-3.40 (m, 2H), 3.30-3.20 (m, 2H), 3.20-3.10 (m, 2H), 3.00-2.80 (m, 4H), 2.80-2.70 (m, 2H), 2.10-1.90 (m, 8H), 1.80-1.60 (m, 6H) 1.40-1.10 (m, 42H), 0.90 (m, 6H).

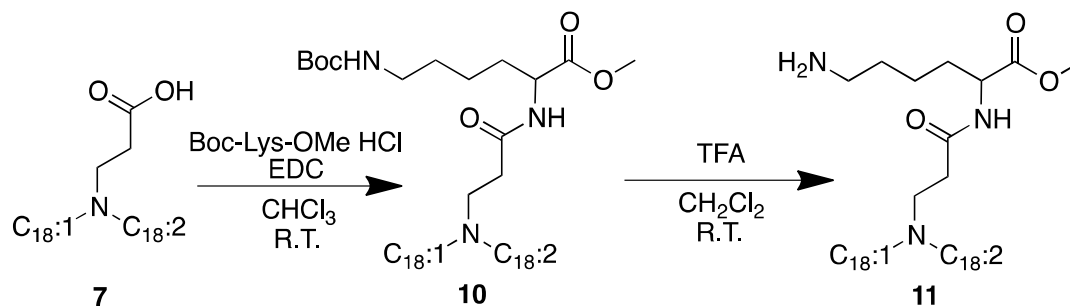

**Scheme 4:** Synthesis of LOA-LysC2-OMe

*Synthesis of 10*

1g of **7** (588.0g/mol, 1.7mmol, 1.0 eq), 0.56g Boc-Lys-OMe HCl (296.79g/mol, 1.9mmol, 1.1 eq), 0.41g EDC (155.24g/mol, 2.6mmol, 1.5 eq) were added to 30mL  $\text{CHCl}_3$  and stirred at room temperature for 24 hours. Solvent was removed by rotary evaporation. The resulting oily solid was solubilized in 100mL EtOAc and washed 2x with 20mL 1M HCl and 2x with 20mL brine. The organic layer was dried over  $\text{Na}_2\text{SO}_4$  and concentrated to an oil. The crude product was purified by HPFC using an elution gradient of 0-10% MeOH in  $\text{CHCl}_3$ . MW calc ( $\text{C}_{54}\text{H}_{95}\text{N}_3\text{O}_5$ ) = 830.32 found 831.29. 0.85g (60%). TLC:  $R_f$  = 0.45 (95:4.5:0.5  $\text{CH}_2\text{Cl}_2$ :MeOH: $\text{NH}_3\text{OH}$ ).

$^1\text{H}$  NMR (300 MHz,  $\text{CDCl}_3$ ): 5.50-5.30 (m, 6H), 4.40 (m, 1H), 3.70 (s, 3H), 3.50-3.40 (m, 2H), 3.30-3.20 (m, 2H), 3.20-3.10 (m, 2H) 3.00-2.80 (m, 4H), 2.80-2.70 (m, 2H), 2.10-1.90 (m, 8H), 1.90-1.70 (m, 8H), 1.55 (m, 2H), 1.40 (s, 9H), 1.40-1.10 (m, 38H), 0.90 (m, 6H).

*Synthesis of 11*

0.85g of **10** (830.32g/mol, 1.0mmol, 1.0 eq) was stirred in 10mL 1:1 TFA: $\text{CH}_2\text{Cl}_2$  at room temperature for 1 hour. TFA and  $\text{CH}_2\text{Cl}_2$  were removed by rotary evaporation, and the resulting oil was solubilized in 50 mL EtOAc, washed 2x with 10mL 1M  $\text{NaHCO}_3$  and 2x with 10mL brine. The organic layer was dried over  $\text{Na}_2\text{SO}_4$  and concentrated to an oil. The crude product was purified by HPFC using an elution gradient of 0-20% MeOH in  $\text{CHCl}_3$ . MW calc. ( $\text{C}_{45}\text{H}_{85}\text{N}_3\text{O}_3$ ) = 730.20 found 730.73. 0.6g (82%). TLC:  $R_f$  = 0.15 (90:9:1  $\text{CH}_2\text{Cl}_2$ :MeOH: $\text{NH}_3\text{OH}$ ).

$^1\text{H}$  NMR (300 MHz,  $\text{CDCl}_3$ ): 5.50-5.30 (m, 6H), 4.40 (m, 1H), 3.70 (s, 3H) 3.50-3.40 (m, 2H), 3.30-3.20 (m, 2H), 3.20-3.10 (m, 2H) 3.00-2.80 (m, 4H), 2.80-2.70 (m, 2H), 2.10-1.90 (m, 8H), 1.80-1.60 (m, 6H) 1.40-1.10 (m, 42H), 0.90 (m, 6H).

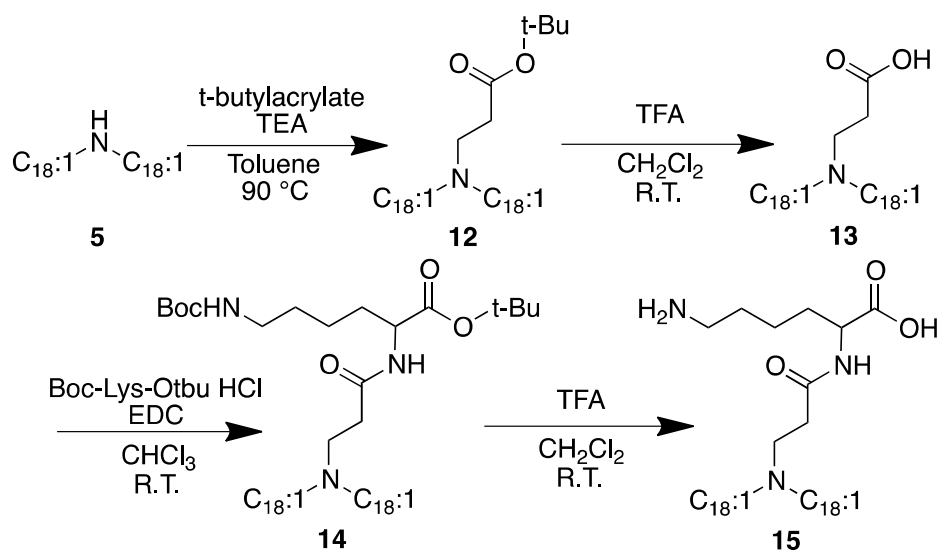

**Scheme 3:** Synthesis of DOA-LysC2

#### Synthesis of **12**

2g of **5** (517.96 g/mol, 3.9mmol, 1.0 eq), 1g of t-butylacrylate (128.17g/mol, 7.8mmol, 2.0 eq), and 1.6g triethylamine (TEA) (101.19g/mol, 11.2mmol, 4.0 eq) were solubilized in 10mL toluene and stirred at 90°C for 72 hours. Solvent was removed by rotary evaporation, and the resulting oil was solubilized in 50 mL EtOAc, washed 2x with 10mL 1M HCl and 2x with 10mL brine. The organic layer was then dried over Na<sub>2</sub>SO<sub>4</sub> and concentrated to an oil. The crude product was purified by HPFC using an elution gradient of 0-5% MeOH in CHCl<sub>3</sub>. MW calc. (C<sub>43</sub>H<sub>83</sub>NO<sub>2</sub>) = 646.12 found 647.02. 1.4g (56%). TLC: *R<sub>f</sub>* = 0.9 (95:4.5:0.5 CH<sub>2</sub>Cl<sub>2</sub>:MeOH:NH<sub>3</sub>OH).

<sup>1</sup>H NMR (300 MHz, CDCl<sub>3</sub>): 5.50-5.30 (m, 4H), 3.20 (m, 2H), 3.00-2.80 (m, 4H), 2.80-2.60 (m, 2H), 2.10-1.90 (m, 8H), 1.90-1.70 (m, 4H), 1.50 (s, 9H) 1.40-1.10 (m, 44H), 0.90 (m, 6H).

#### Synthesis of **13**

1.35g **12** (646.12g/mol, 2.1mmol) was stirred in 10mL 1:1 TFA:CH<sub>2</sub>Cl<sub>2</sub> at room temperature for 1 hour. TFA and CH<sub>2</sub>Cl<sub>2</sub> were removed by rotary evaporation, and the resulting oil was solubilized in 50 mL EtOAc, washed 2x with 10mL 1M NaHCO<sub>3</sub> and 2x with 10mL brine. The organic layer was dried over Na<sub>2</sub>SO<sub>4</sub> and concentrated to an oil. MW calc. (C<sub>39</sub>H<sub>75</sub>NO<sub>2</sub>) = 590.02 found 590.86. 1.05g (85%). TLC: *R<sub>f</sub>* = 0.3 (95:4.5:0.5 CH<sub>2</sub>Cl<sub>2</sub>:MeOH:NH<sub>3</sub>OH).

<sup>1</sup>H NMR (300 MHz, CDCl<sub>3</sub>): 5.50-5.30 (m, 4H), 3.20 (m, 2H), 3.00-2.80 (m, 4H), 2.80-2.60 (m, 2H), 2.10-1.90 (m, 8H), 1.90-1.70 (m, 4H), 1.40-1.10 (m, 44H), 0.90 (m, 6H).

#### Synthesis of **14**

1g of **13** (590.02g/mol, 1.7mmol, 1.0 eq), 0.64g Boc-Lys-OtBu HCl (338.87g/mol, 1.9mmol, 1.1 eq), 0.4g EDC (155.24g/mol, 2.55mmol, 1.5 eq) were added to 30mL CHCl<sub>3</sub> and stirred at room temperature for 24 hours. Solvent was removed by rotary evaporation. The resulting oily solid was solubilized in 100mL EtOAc and washed 2x with 20mL 1M HCl and 2x with 20mL brine. The organic layer was dried over Na<sub>2</sub>SO<sub>4</sub> and concentrated to an oil. The crude product was purified by HPFC using an elution gradient of 0-10% MeOH in CHCl<sub>3</sub>. MW calc (C<sub>54</sub>H<sub>103</sub>N<sub>3</sub>O<sub>5</sub>) = 874.41 found 874.68. 1.05g (71%). TLC: *R<sub>f</sub>* = 0.45 (95:4.5:0.5 CH<sub>2</sub>Cl<sub>2</sub>:MeOH:NH<sub>3</sub>OH).

$^1\text{H NMR}$  (300 MHz,  $\text{CDCl}_3$ ): 5.50-5.30 (m, 4H), 4.40 (m, 1H), 3.50-3.40 (m, 2H), 3.30-3.20 (m, 2H), 3.20-3.10 (m, 2H) 3.00-2.80 (m, 6H), 2.10-1.90 (m, 8H), 1.90-1.70 (m, 8H), 1.40 (s, 18H), 1.40-1.10 (m, 44H), 0.90 (m, 6H).

### Synthesis of 15

1.05g of **14** (874.41g/mol, 1.2mmol, 1.0 eq) was stirred in 10mL 1:1 TFA: $\text{CH}_2\text{Cl}_2$  at room temperature for 1 hour. TFA and  $\text{CH}_2\text{Cl}_2$  were removed by rotary evaporation, and the resulting oil was solubilized in 50 mL EtOAc, washed 2x with 10mL 1M  $\text{NaHCO}_3$  and 2x with 10mL brine. The organic layer was dried over  $\text{Na}_2\text{SO}_4$  and concentrated to an oil. The crude product was purified by HPFC using an elution gradient of 0-30% MeOH in  $\text{CHCl}_3$ . MW calc. ( $\text{C}_{45}\text{H}_{87}\text{N}_3\text{O}_3$ ) = 718.19 found 719.04. 0.61g (71%). TLC:  $R_f$  = 0.15 (72.5:25:2.5  $\text{CH}_2\text{Cl}_2$ :MeOH: $\text{NH}_3\text{OH}$ ).

$^1\text{H NMR}$  (300 MHz,  $\text{CDCl}_3$ ): 5.50-5.30 (m, 4H), 4.40 (m, 1H), 3.50-3.40 (m, 2H), 3.30-3.20 (m, 2H), 3.20-3.10 (m, 2H) 3.00-2.80 (m, 4H), 2.10-1.90 (m, 8H), 1.80-1.60 (m, 6H) 1.40-1.10 (m, 46H), 0.90 (m, 6H).

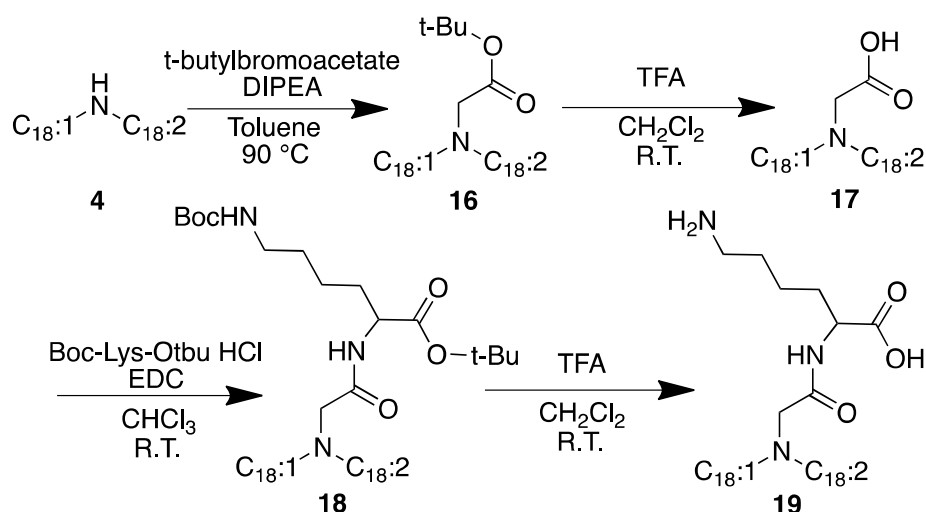

**Scheme 5:** Synthesis of LOA-LysC1

### Synthesis of 16

2g of **4** (515.94g/mol, 3.9mmol, 1.0 eq), 1.5g of t-butylbromoacetate (195.05g/mol, 7.8mmol, 2.0 eq), and 1.3g DIPEA (129.24g/mol, 9.8mmol, 2.5 eq) were solubilized in 10mL toluene and stirred at 80°C for 48 hours. Solvent was removed by rotary evaporation, and the resulting oil was solubilized in 100 mL EtOAc, washed 2x with 20mL 1M HCl and 2x with 20mL brine. The organic layer was then dried over  $\text{Na}_2\text{SO}_4$  and concentrated to an oil. The crude product was purified by HPFC using an elution gradient of 0-8% MeOH in  $\text{CHCl}_3$ . MW calc. ( $\text{C}_{42}\text{H}_{79}\text{NO}_2$ ) = 630.08 found 630.36. 1.89g (77%). TLC:  $R_f$  = 0.85 (95:4.5:0.5  $\text{CH}_2\text{Cl}_2$ :MeOH: $\text{NH}_3\text{OH}$ ).

$^1\text{H NMR}$  (300 MHz,  $\text{CDCl}_3$ ): 5.50-5.30 (m, 6H), 3.70-3.60 (s, 2H), 3.30-3.20 (m, 4H), 2.80-2.70 (m, 2H), 2.10-1.90 (m, 8H), 1.90-1.70 (m, 4H), 1.50 (s, 9H), 1.40-1.10 (m, 38H), 0.90 (m, 6H).

### Synthesis of 17

1.8g of **16** (630.08g/mol, 2.9mmol) was stirred in 10mL 1:1 TFA:CH<sub>2</sub>Cl<sub>2</sub> at room temperature for 1 hour. TFA and CH<sub>2</sub>Cl<sub>2</sub> were removed by rotary evaporation, and the resulting oil was solubilized in 100 mL EtOAc, washed 2x with 20mL 1M NaHCO<sub>3</sub> and 2x with 20mL brine. The organic layer was dried over Na<sub>2</sub>SO<sub>4</sub> and concentrated to an oil. MW calc. (C<sub>38</sub>H<sub>71</sub>NO<sub>2</sub>) = 573.98 found 574.42. 1.55g (93%). TLC: R<sub>f</sub> = 0.3 (95:4.5:0.5 CH<sub>2</sub>Cl<sub>2</sub>:MeOH:NH<sub>3</sub>OH).

<sup>1</sup>H NMR (300 MHz, CDCl<sub>3</sub>): 5.50-5.30 (m, 6H), 3.90-3.80 (s, 2H), 3.40-3.20 (m, 4H), 2.80-2.70 (m, 2H), 2.10-1.90 (m, 8H), 1.90-1.70 (m, 4H), 1.40-1.10 (m, 38H), 0.90 (m, 6H).

#### *Synthesis of 18*

0.9g of **17** (574.42g/mol, 1.6mmol, 1.0 eq), 0.61g Boc-Lys-Otbu HCl (338.87g/mol, 1.8mmol, 1.1 eq), 0.38g EDC (155.24g/mol, 2.4mmol, 1.5 eq) were added to 30mL CHCl<sub>3</sub> and stirred at room temperature for 24 hours. Solvent was removed by rotary evaporation. The resulting oily solid was solubilized in 100mL EtOAc and washed 2x with 20mL 1M HCl and 2x with 20mL brine. The organic layer was dried over Na<sub>2</sub>SO<sub>4</sub> and concentrated to an oil. The crude product was purified by HPFC using an elution gradient of 0-10% MeOH in CHCl<sub>3</sub>. MW calc (C<sub>53</sub>H<sub>99</sub>N<sub>3</sub>O<sub>5</sub>) = 858.37 found 859.24. 0.93g (68%). TLC: R<sub>f</sub> = 0.45 (95:4.5:0.5 CH<sub>2</sub>Cl<sub>2</sub>:MeOH:NH<sub>3</sub>OH).

<sup>1</sup>H NMR (300 MHz, CDCl<sub>3</sub>): 5.50-5.30 (m, 6H), 4.40 (m, 1H), 3.50-3.40 (s, 2H), 3.40-3.30 (m, 2H), 3.20-3.10 (m, 4H), 2.80-2.70 (m, 2H), 2.10-1.90 (m, 8H), 1.90-1.70 (m, 8H), 1.55 (m, 2H), 1.40 (s, 18H), 1.40-1.10 (m, 38H), 0.90 (m, 6H).

#### *Synthesis of 19*

0.9g of **18** (858.37g/mol, 1.0mmol, 1.0 eq) was stirred in 10mL 1:1 TFA:CH<sub>2</sub>Cl<sub>2</sub> at room temperature for 1 hour. TFA and CH<sub>2</sub>Cl<sub>2</sub> were removed by rotary evaporation, and the resulting oil was solubilized in 50 mL EtOAc, washed 2x with 10mL 1M NaHCO<sub>3</sub> and 2x with 10mL brine. The organic layer was dried over Na<sub>2</sub>SO<sub>4</sub> and concentrated to an oil. The crude product was purified by HPFC using an elution gradient of 0-30% MeOH in CHCl<sub>3</sub>. MW calc. (C<sub>44</sub>H<sub>83</sub>N<sub>3</sub>O<sub>3</sub>) = 702.15 found 703.01. 0.51g (72%). TLC: R<sub>f</sub> = 0.15 (72.5:25:2.5 CH<sub>2</sub>Cl<sub>2</sub>:MeOH:NH<sub>3</sub>OH).

<sup>1</sup>H NMR (300 MHz, CDCl<sub>3</sub>): 5.50-5.30 (m, 6H), 4.40 (m, 1H), 3.50-3.40 (s, 2H), 3.30-3.20 (m, 2H), 3.00-2.80 (m, 4H), 2.80-2.70 (m, 2H), 2.10-1.90 (m, 8H), 1.80-1.60 (m, 6H) 1.40-1.10 (m, 42H), 0.90 (m, 6H).

#### **siRNA Sequences**

Lowercase = 2'-fluoro modified nucleotides

Asterisk = phosphorothioate linkage

#### **Anti-Luciferase**

Sense: 5' -GCUACAUUCUGGAGAGAUAdTdT-3'

Antisense: 5' -UAUGUCUCCAGAAUGUAGCdTdT-3'

Non-specific control provided by Pfizer

#### **Factor VII**

Sense: 5' -GGAucAucucAAGucuuAcT\*T-3'

Antisense: 5' -GuAAGAcuuGAGAuGAuccT\*T-3'

Non-specific: siGenome Non-Targeting siRNA #5 (Dharmacon, Lafayette, CO)

SUPPLEMENTAL TABLES AND FIGURES

| Ionizable Lysine Lipid | Size (nm) | PDI  | Encapsulation Efficiency (%) |
|------------------------|-----------|------|------------------------------|
| LOA-LysC2              | 89.7      | 0.16 | 91.6                         |
| DOA-LysC2              | 98.0      | 0.18 | 93.6                         |
| LOA-LysC1              | 85.8      | 0.13 | 83.5                         |
| LOA-LysC2-OMe          | 103.6     | 0.15 | 92.7                         |

**Table S1:** Size, PDI, and encapsulation efficiency of ILL liposomes (40:40:10:10 ILL:Chol:DSPC:PEG-DMG)

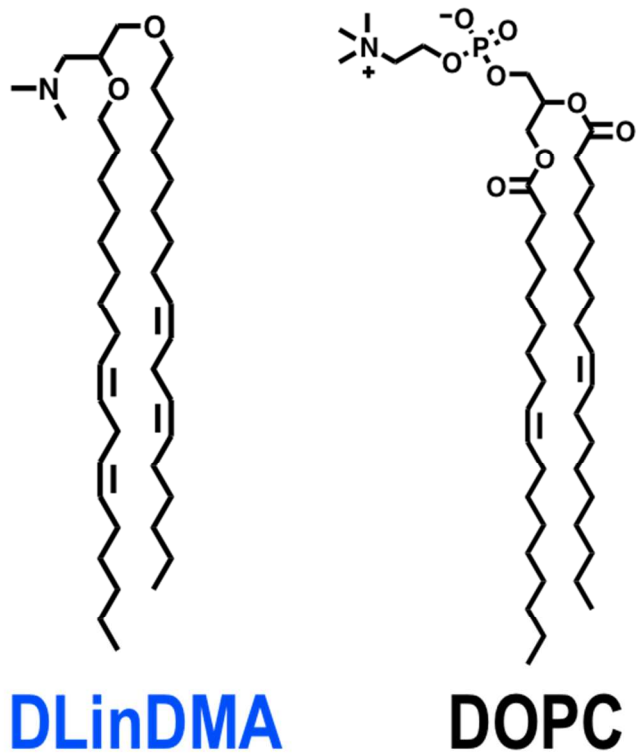

**Figure S1:** Lipid structures for positive (DLinDMA) and negative (DOPC) control lipids.



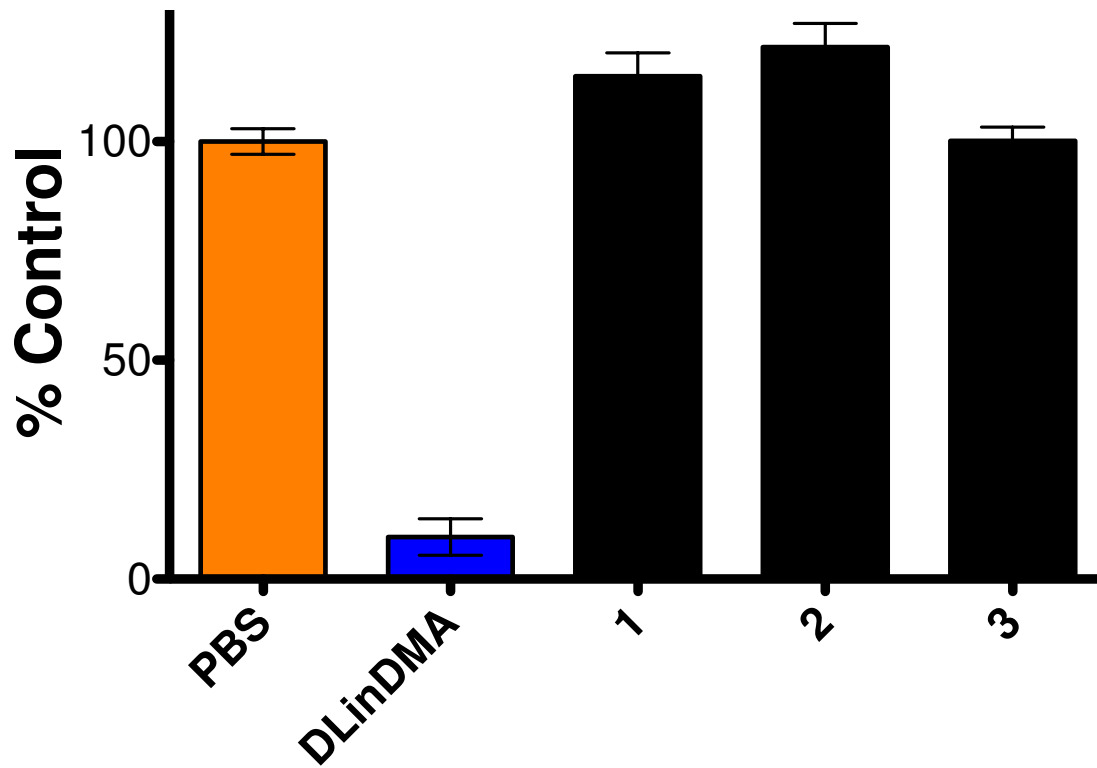

**Figure S2:** Factor VII knockdown experiments with LOA-LysC2 containing liposomal siRNA formulations. DLinDMA containing formulations (40:40:10:10 DLinDMA:Chol:DSPC:PEG-DMG) were used as a positive control. LOA-LysC2 containing formulations were:

1. 40:40:10:10 LOA-LysC2:Chol:DSPC:PEG-DMG
2. 40:40:10:10 LOA-LysC2:Chol:POPC:PEG-DMG
3. 40:40:10:10 LOA-LysC2:Chol:POPE:PEG-DMG

No significant knockdown was observed for any LOA-LysC2 containing formulation.

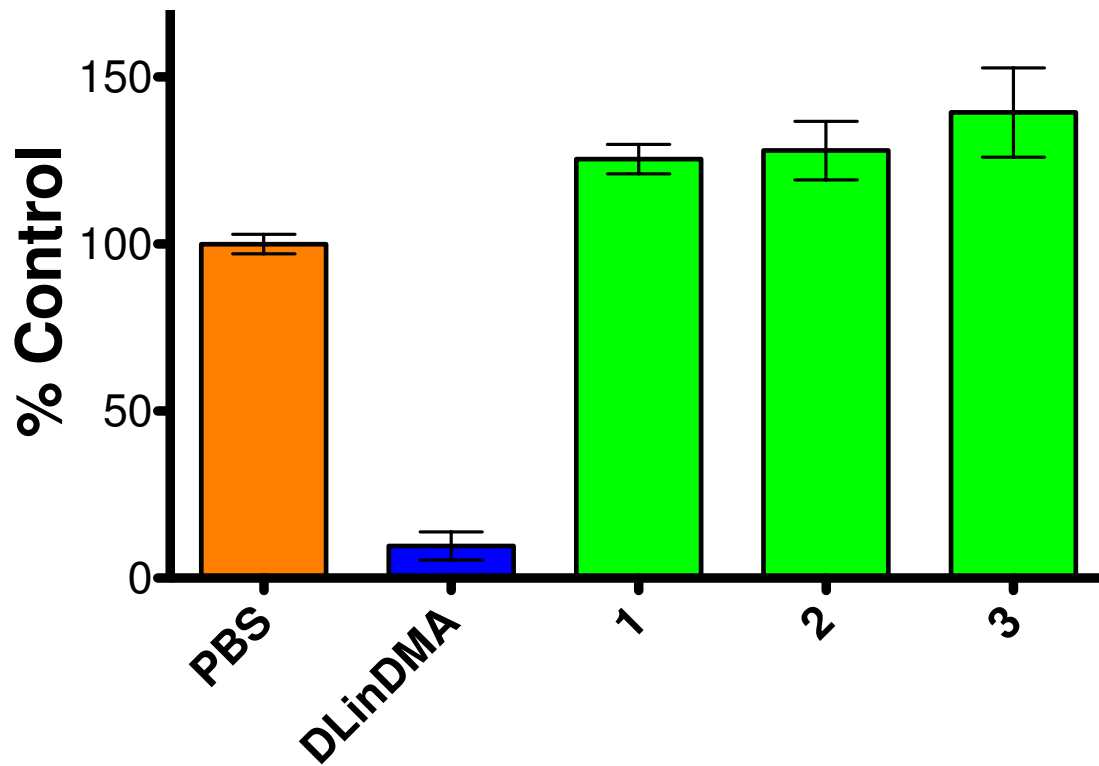

**Figure S3:** Factor VII knockdown experiments with LOA-LysC2-OMe containing liposomal siRNA formulations. DLinDMA containing formulations (40:40:10:10 DLinDMA:Chol:DSPC:PEG-DMG) were used as a positive control. LOA-LysC2 containing formulations were:

1. 40:40:10:10 LOA-LysC2:Chol:DSPC:PEG-DMG
2. 40:40:10:10 LOA-LysC2:Chol:POPC:PEG-DMG
3. 48:40:10:2 LOA-LysC2:Chol:POPC:PEG-DMG

No significant knockdown was observed for any LOA-LysC2-OMe containing formulation.
